# Supplementary material
Source: PubMed Central journal article supplement (PMC6989824)
Supplement: mmc1.pdf [file mmc1.pdf]

## Appendix A

a) Execute Arm: Single Trial

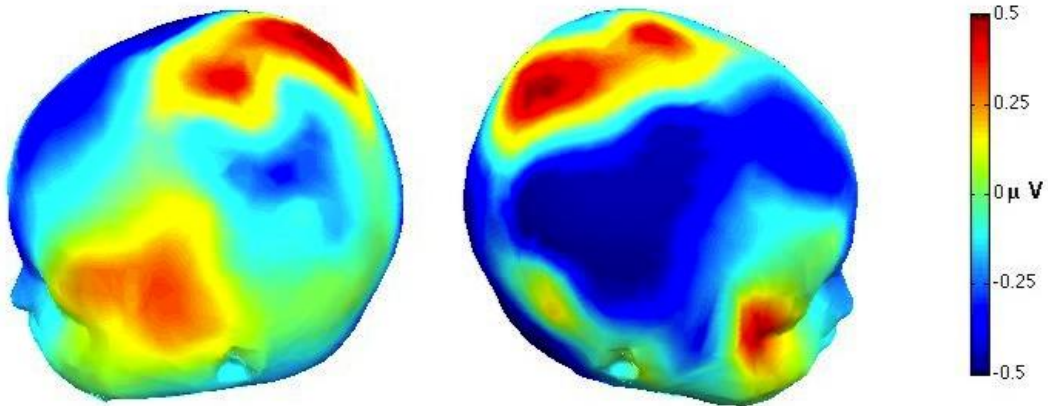

b) Execute Leg: Single Trial

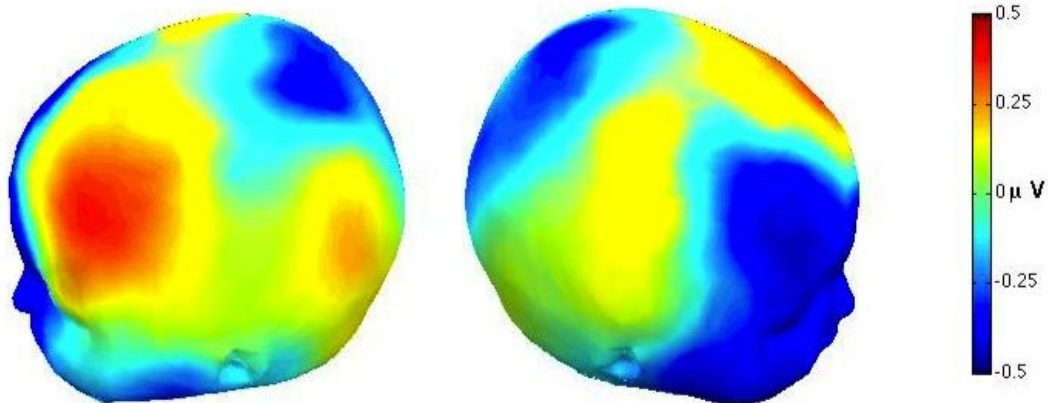

**Supplementary Figure 1.** Topographical plots demonstrating the scalp distribution of sensorimotor alpha suppression (6-9 Hz during the execution of a) a reaching action and b) a kicking action. The plots show baseline-corrected activity from one trial of a representative infant participant (participant 19).

## Appendix B

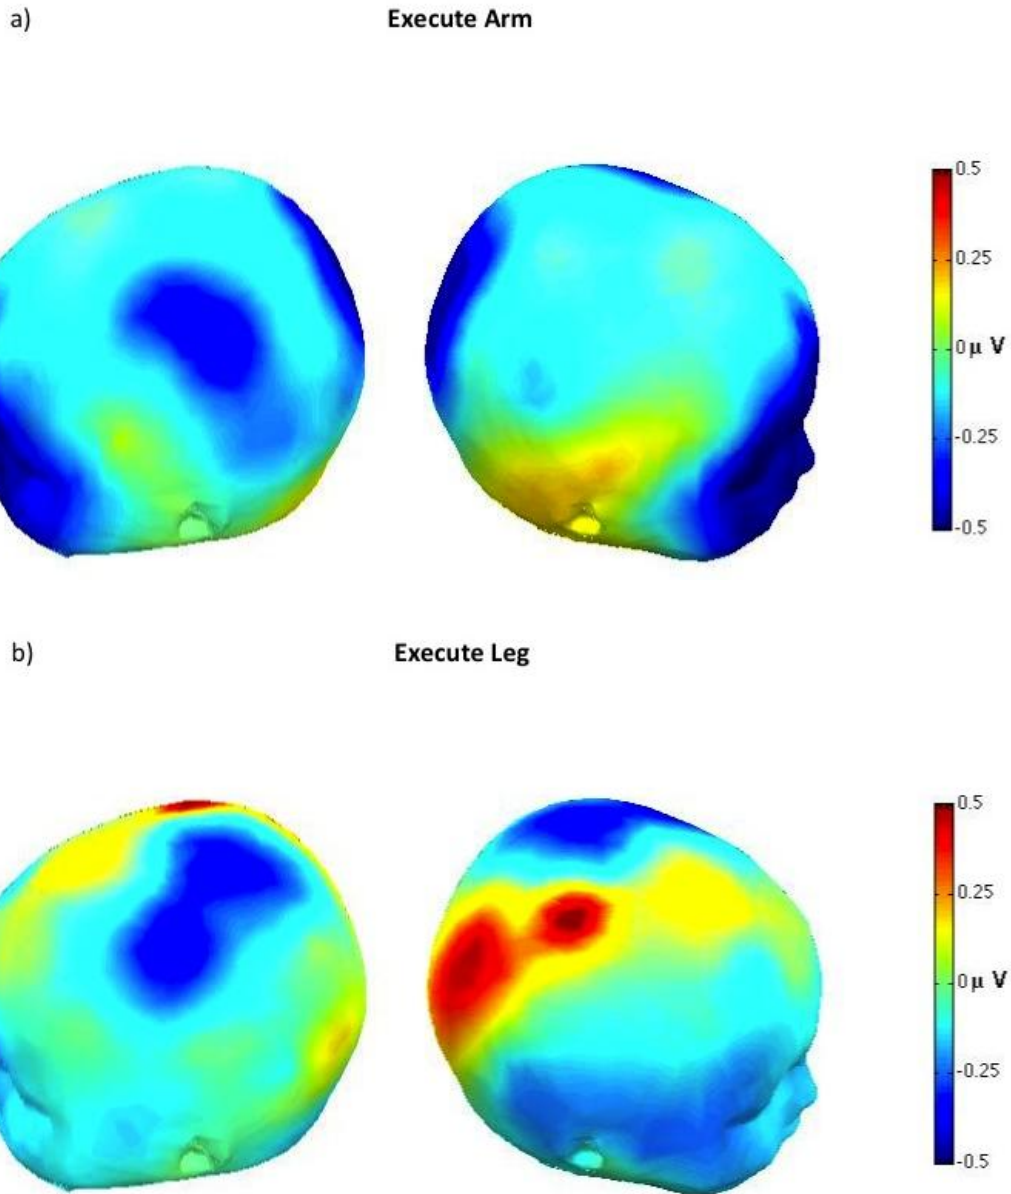

**Supplementary Figure 2.** Topographical plots demonstrating the scalp distribution of sensorimotor alpha suppression (6-9 Hz) in infant participants during the execution of a) arm actions and b) leg actions.

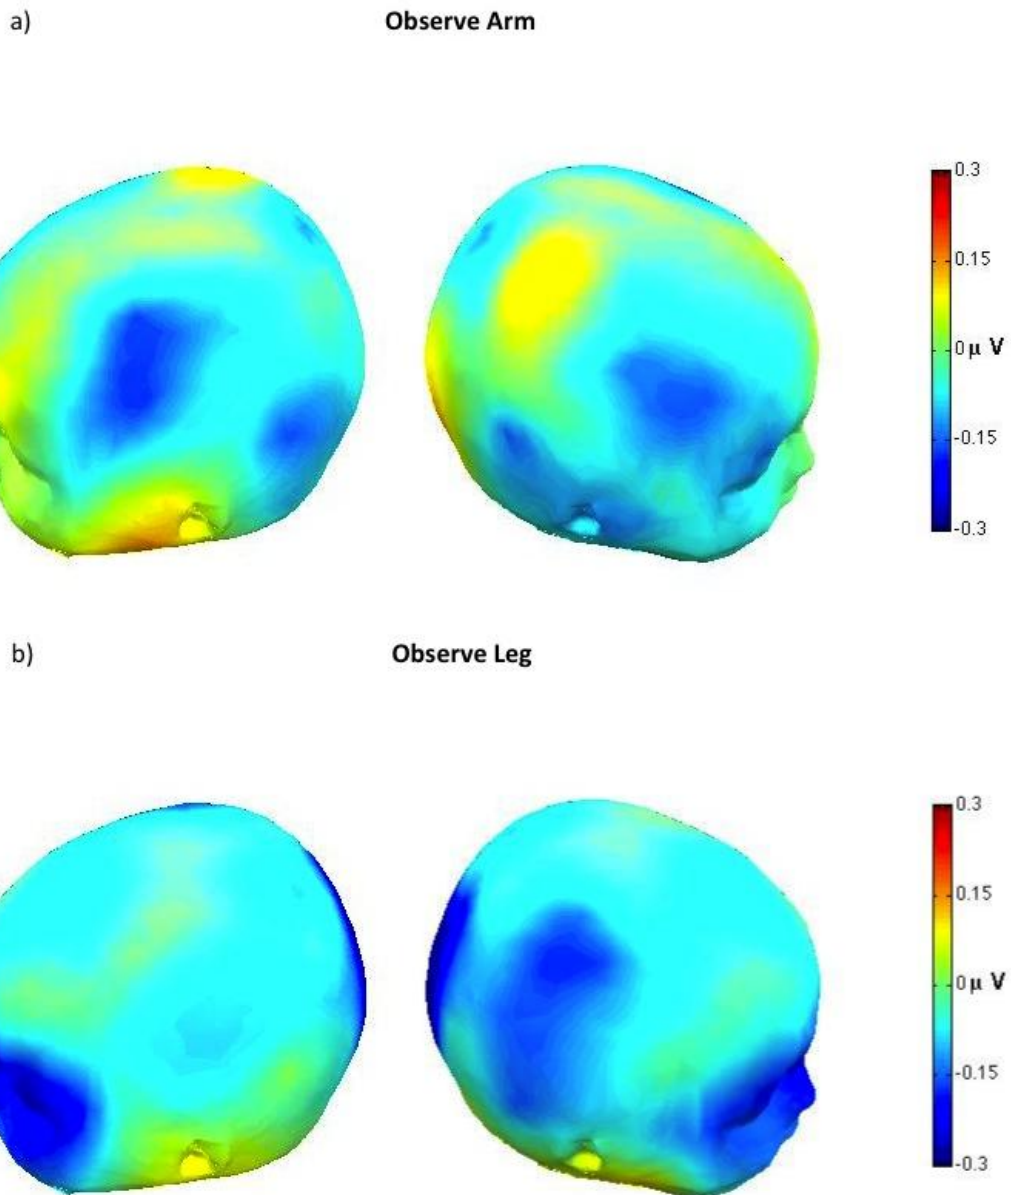

*Supplementary Figure 3.* Topographical plots demonstrating the scalp distribution of sensorimotor alpha suppression (6-9 Hz) in infant participants during the observation of a) arm actions and b) leg actions.
